# Supplementary material for: Nitrogen- and oxygen-enriched 3D hierarchical porous carbon fibers: synthesis and superior supercapacity
Source: Royal Society of Chemistry journal article supplement (doi:10.1039/c5ta02702k), 2015-01-01
Supplement: c5ta02702k1.pdf [file c5ta02702k1.pdf]

Electronic Supplementary Material (ESI) for Journal of Materials Chemistry A.

## Nitrogen- and Oxygen-Enriched 3D Hierarchical Porous Carbon fiber: Synthesis and Superior Supercapacity

Ying Li<sup>a,b</sup>, Chunxiang Lu<sup>a</sup>, Shouchun Zhang<sup>\*a</sup>, Fang-Yuan Su<sup>c</sup>, Wenzhong Shen<sup>d</sup>, Pucha Zhou<sup>a</sup>,  
Canliang Ma<sup>e</sup>

This supporting information contains the electrochemical experiment using a three-electrode cell, the SEM and TEM images, the porous structure parameters, the XRD patterns, the electrochemical capacitive performances using a two-electrode cell and a three-electrode cell.

### Electrochemical experimental for a three-electrode cell

The preparation of the working electrode in the three-electrode configuration was the same as in the two-electrode cell. Hg/HgO electrode served as the reference electrode, and a platinum sheet as the counter electrode. The gravimetric capacitance ( $C$ ,  $F g^{-1}$ ) for the three-electrode cells was calculated according to the GCD test by the following equation:

$$C = I \Delta t / m \Delta V \quad (2)$$

where  $I$  (A) is the discharge current,  $\Delta t$  (s) is the discharge time,  $m$  (g) is the mass of single carbon electrode and  $\Delta V$  (V) is the potential difference.

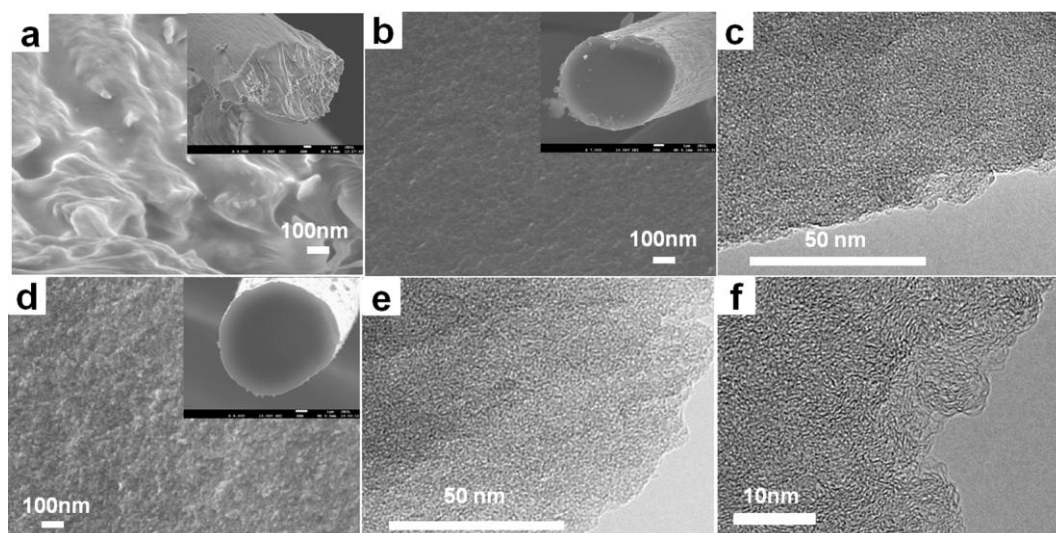

Fig. S1 SEM and TEM images of the cross section morphology of the control samples: (a) SEM image of NPF, the nonporous commercial PAN fiber; (b) SEM and (c) TEM images of NCF, the nonporous carbon fiber derived from NPF after carbonization; (d) SEM and (e, f) TEM images of ACF, the activation product of NCF. The insets in (a, b, d) are the low-resolution SEM images of NPF, NCF, and ACF, respectively.

Table S1 the detail information about pore structure of samples

| Sample | $S_{\text{BET}}$ ( $\text{m}^2 \text{g}^{-1}$ ) | $S_{\text{micro}}$ ( $\text{m}^2 \text{g}^{-1}$ ) | $V_{\text{total}}$ ( $\text{cm}^3 \text{g}^{-1}$ ) | $V_{\text{BJH}}$ ( $\text{cm}^3 \text{g}^{-1}$ ) |
|--------|-------------------------------------------------|---------------------------------------------------|----------------------------------------------------|--------------------------------------------------|
| PF     | 72.5                                            | –                                                 | 0.522                                              | 0.522                                            |
| NPF    | 0.2                                             | 0.1                                               | –                                                  | –                                                |
| CF     | 98.9                                            | 13.3                                              | 0.129                                              | 0.128                                            |
| NCF    | 8.5                                             | –                                                 | 0.026                                              | –                                                |
| HPCF   | 2176.6                                          | 1730.7                                            | 1.272                                              | 0.740                                            |
| ACF    | 1002.9                                          | 827.9                                             | 0.521                                              | 0.208                                            |

$S_{\text{BET}}$ : Total surface area calculated by the BET method.

$S_{\text{micro}}$ : Micropore surface area derived from t-Plot method.

$V_{\text{total}}$ : Total pore volume of pores calculated from single point adsorption at the relative pressure of  $P/P_0$  of 0.995.

$V_{\text{BJH}}$ : Mesopore and macropore volume calculated using the BJH method.

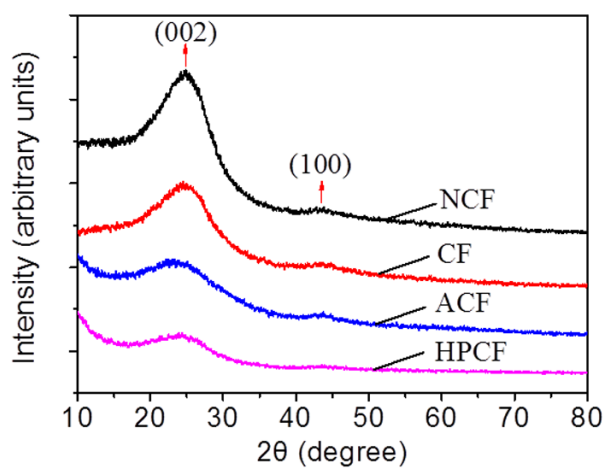

Fig. S2 XRD patterns of NCF, CF, ACF and HPCF.

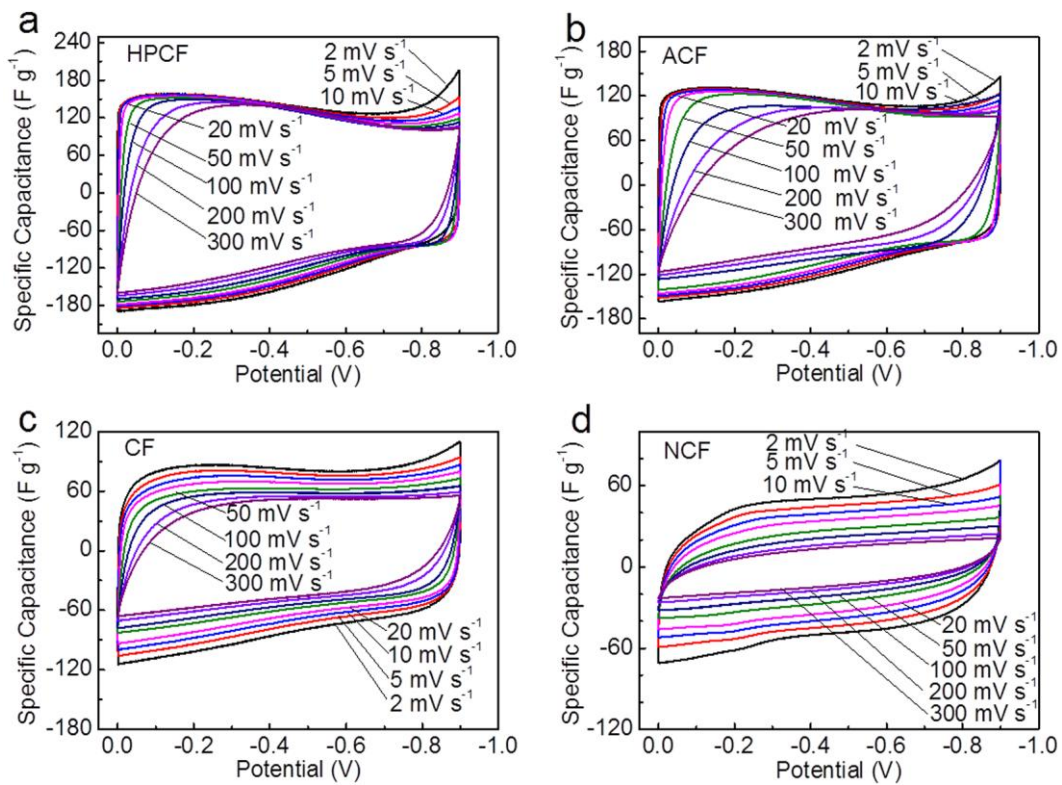

Fig. S3 CV curves at the scan rate range of 2-300  $mV s^{-1}$  for (a) HPCF, (b) ACF, (c) CF and (d) NCF using a two-electrode cell.

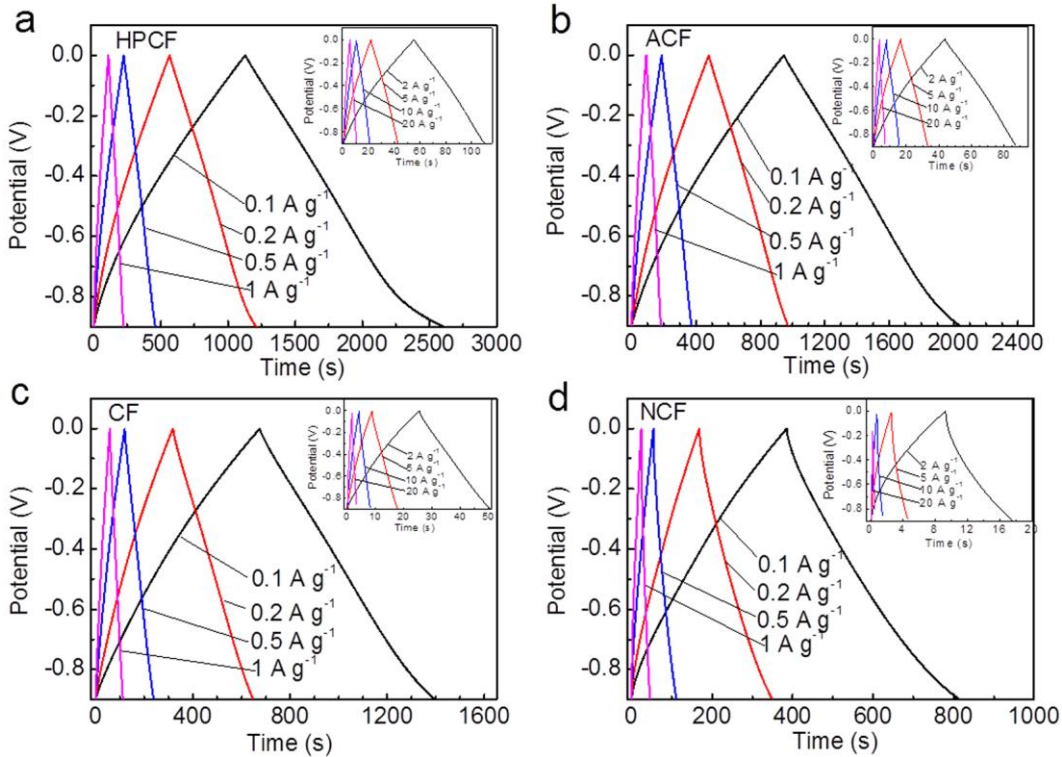

Fig. S4 GCD curves at the current density range of 0.1-20  $A g^{-1}$  for (a) HPCF, (b) ACF, (c) CF and (d) NCF using a two-electrode cell.

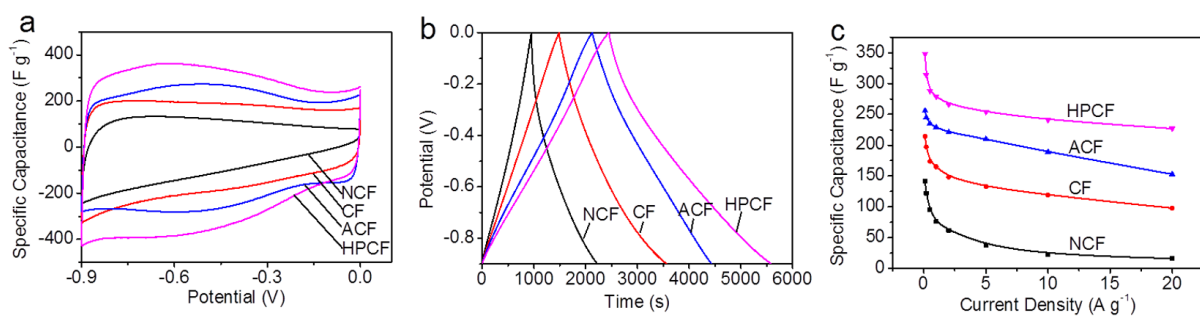

Fig. S5 CV curves at  $5 \text{ mV s}^{-1}$  (a), GCD curves at  $0.1 \text{ A g}^{-1}$  (b), and specific capacitances as a function of current densities at the range of  $0.1\text{-}20 \text{ A g}^{-1}$  (c) for NCF, CF, ACF, and HPCF, derived in a three-electrode configuration.
